# Supplementary material for: Molecular, Metabolic, and Subcellular Mapping of the Tumor Immune Microenvironment via 3D Targeted and Non-Targeted Multiplex Multi-Omics Analyses
Source: MDPI journal article supplement (doi:10.3390/cancers16050846), 2024-02-20
Supplement: s1 [file Table S1.xlsx]

## Sheet: Sheet1
Table S1. Clinicopathological characteristics of samples used
		Sample
Name	HGSOC		AEH
Diagnosis	High-grade serous ovarian cancer		Atypical endometrial hyperplasia
Organ site	Ovary		Uterus
Grade	3		-
Stage	3		-
Histology	Serous		Atypical hyperplasia
Age	58		49
Race	White		White
