# Supplementary material for: Molecular, Metabolic, and Subcellular Mapping of the Tumor Immune Microenvironment via 3D Targeted and Non-Targeted Multiplex Multi-Omics Analyses
Source: MDPI journal article supplement (doi:10.3390/cancers16050846), 2024-02-20
Supplement: s1 [file Table S2.xlsx]

## Sheet: Table S2
Table S2. Primary antibodies and conditions used in the COMET analysis of high-grade serous ovarian cancer sample
	TRITC-Channel (555 nm)						Cy5-Channel (647 nm)
Cycle	Target	Clone	Host	Dilution	Incubation Time		Target	Clone	Host	Dilution	Incubation Time
1	CD31	3F8E2	Mouse	1:250	8 minutes		CD4	EPR6855	Rabbit	1:200	8 minutes
2	CD11c	D3V1E	Rabbit	1:600	4 minutes		CD8	C8/144B	Mouse	1:250	4 minutes
3	TIGIT	BLR047F	Rabbit	1:300	4 minutes		CD33	1B3G4	Mouse	1:300	4 minutes
4	CD163	10D6	Mouse	1:50	8 minutes		FOXP3	polyclonal	Rabbit	1:100	8 minutes
5	CD20	L26	Mouse	1:300	4 minutes		CD66b	BLR111H	Rabbit	1:200	4 minutes
6	CD45RO	UHCL1	Mouse	1:1000	4 minutes		Granzyme B	polyclonal	Rabbit	1:400	4 minutes
7	CD68	KP-1	Mouse	1:250	8 minutes		CD86	E2G8P	Rabbit	1:200	8 minutes
8	Periostin	1A11A3	Mouse	1:800	4 minutes		CD56	BLR152J	Rabbit	1:1250	4 minutes
9	Ker8/18	polyclonal	Mouse	1:1000	4 minutes		CD45	BL-178-12C7	Rabbit	1:1500	4 minutes
10	COL1A1	E8F4L	Rabbit	1:4000	4 minutes		aSMA	1A4	Mouse	1:3000	4 minutes
