# Supplementary material for: Molecular, Metabolic, and Subcellular Mapping of the Tumor Immune Microenvironment via 3D Targeted and Non-Targeted Multiplex Multi-Omics Analyses
Source: MDPI journal article supplement (doi:10.3390/cancers16050846), 2024-02-20
Supplement: s1 [file Table S4.xlsx]

## Sheet: Table S4
Table S4. Secondary antibodies and conditions used in the COMET analysis
Secondary Antibodies and DAPI	Vendor	Cat No.	Dilution
F(ab')2-Goat anti-Rabbit IgG (H+L) Cross-Adsorbed Secondary Antibody, Alexa Fluor™ 647	Invitrogen	A21246	1:400
F(ab')2-Goat anti-Mouse IgG (H+L) Cross-Adsorbed Secondary Antibody, Alexa Fluor™ 555	Invitrogen	A21425	1:200
F(ab')2-Goat anti-Mouse IgG (H+L) Cross-Adsorbed Secondary Antibody, Alexa Fluor™ Plus 647	Invitrogen	A48289	1:400
F(ab')2-Goat anti-Rabbit IgG (H+L) Cross-Adsorbed Secondary Antibody, Alexa Fluor™ 555	Invitrogen	A21430	1:200
4’,6-diamidino-2-pheynlindole DAPI	ThermoFisher	62248	1:2000
